# Supplementary material for: Association of Plasma Total Cysteine and Anthropometric Status in 6–30 Months Old Indian Children
Source: MDPI journal article supplement (doi:10.3390/nu12103146), 2020-10-15
Supplement: s1 [file s1]

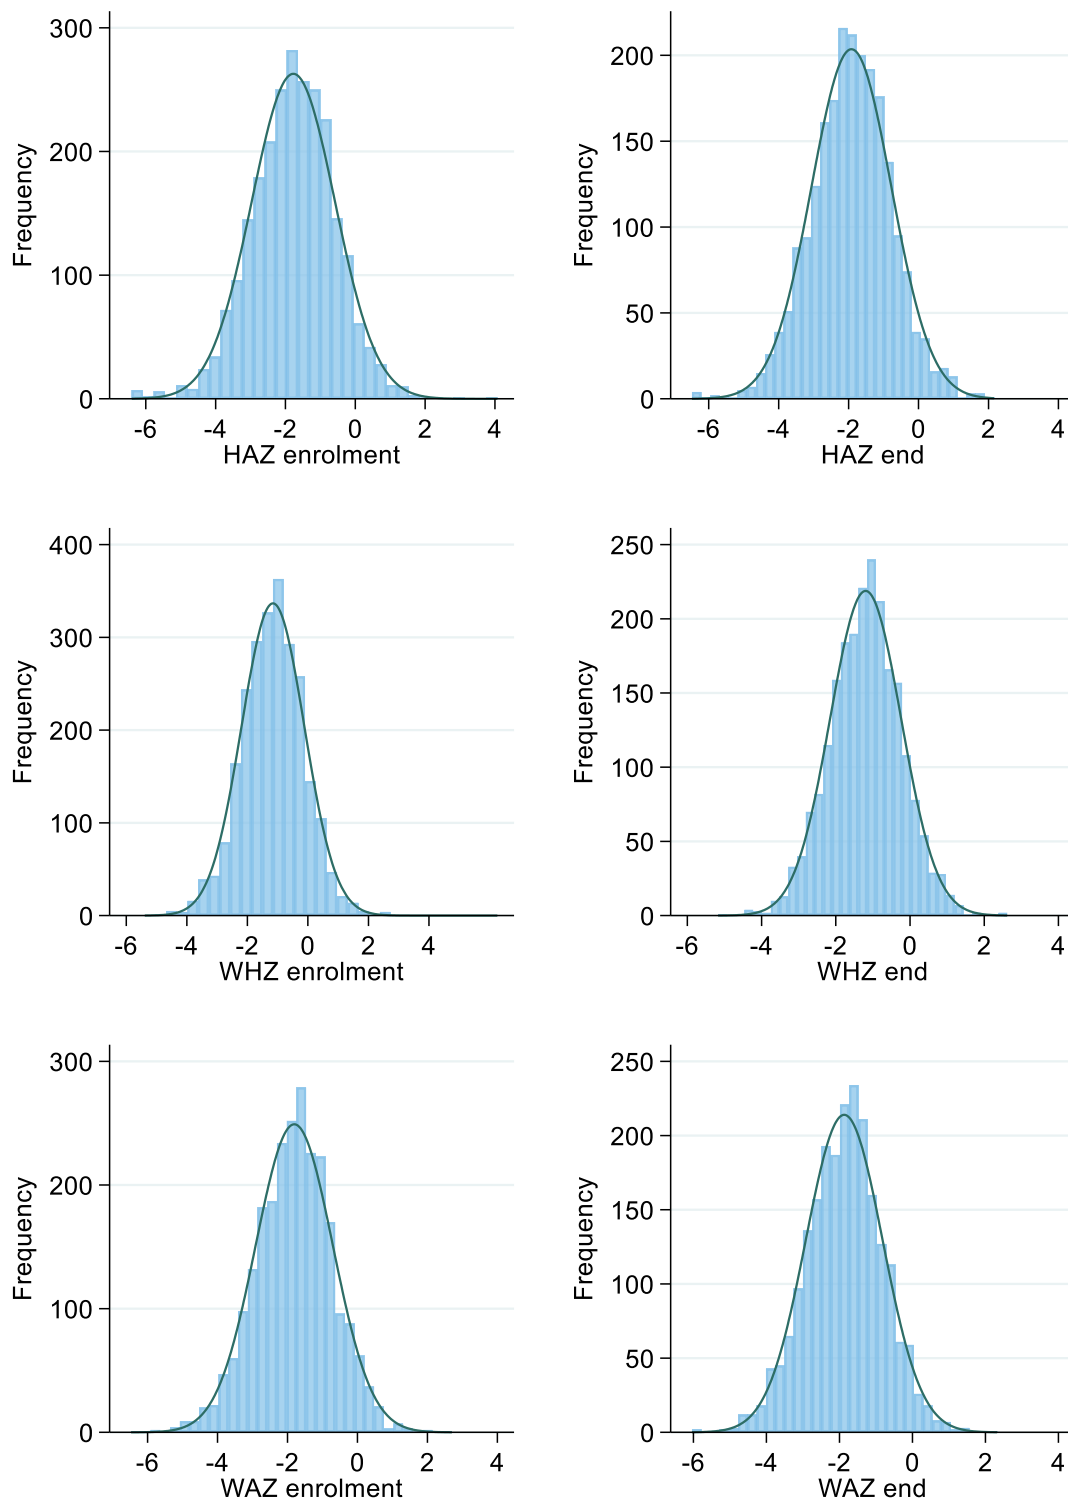

**Supplementary Figure S1:** Histograms of height-for-age Z-scores (HAZ), weight-for-height Z-scores (WHZ), and weight-for-age Z-scores (WAZ) at enrolment into the study and at the end of the study (4 months after enrolment) of 2,102 children aged 6–30 months living in Delhi, India.
